CORRECTION

## Correction: In-person social isolation in the age of smartphones: examining age, period, cohort effects by gender

The *PLOS One* Staff

### Notice of Republication

This article was republished on December 17, 2025. The word “Smartphones” is misspelled in the article title. The correct title is: In-person social isolation in the age of smartphones: Examining age, period, cohort effects by gender. The correct citation is: Peng S, Bauldry S (2025) In-person social isolation in the age of smartphones: Examining age, period, cohort effects by gender. *PLoS One* 20(9): e0333493. <https://doi.org/10.1371/journal.pone.0333493>

### Supporting information

**S1 File. Originally published, uncorrected article.**

(PDF)

**S2 File. Republished, corrected article.**

(PDF)

### Reference

1. Peng S, Bauldry S. In-person social isolation in the age of smartphones: Examining age, period, cohort effects by gender. *PLoS One*. 2025;20(9):e0333493. <https://doi.org/10.1371/journal.pone.0333493> PMID: [41021594](https://pubmed.ncbi.nlm.nih.gov/41021594/)

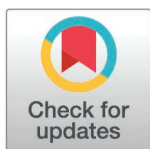

### OPEN ACCESS

**Citation:** The *PLOS One* Staff (2026)

Correction: In-person social isolation in the age of smartphones: examining age, period, cohort effects by gender. *PLoS One* 21(1): e0340147. <https://doi.org/10.1371/journal.pone.0340147>

**Published:** January 2, 2026

**Copyright:** © 2026 The *PLOS One* Staff. This is an open access article distributed under the terms of the [Creative Commons Attribution License](https://creativecommons.org/licenses/by/4.0/), which permits unrestricted use, distribution, and reproduction in any medium, provided the original author and source are credited.
